# Supplementary material for: High water mobility on the ice-binding surface of a hyperactive antifreeze protein
Source: Royal Society of Chemistry journal article supplement (doi:10.1039/c002970j), 2010-01-01
Supplement: c002970j.pdf [file c002970j.pdf]

# High water mobility on the ice-binding surface of a hyperactive antifreeze protein

## Supplementary Information: Further experimental details

Kristofer Modig, Johan Qvist, Christopher B. Marshall, Peter L. Davies and Bertil Halle

**Table S1.** Amino acid composition of *TmAFP* samples A and B. <sup>a</sup>

| Amino acid | Sequence | Sample A | Sample B |
|------------|----------|----------|----------|
| Ala        | 9        | 9.0      | 9.2      |
| Arg        | 0        | 0.1      | 0.1      |
| Asx        | 11       | 11.5     | 11.4     |
| Gly        | 7        | 8.1      | 8.1      |
| Glx        | 4        | 6.1      | 6.4      |
| His        | 2        | 2.0      | 2.1      |
| Ile        | 0        | 0.4      | 0.4      |
| Leu        | 0        | 0.3      | 0.2      |
| Lys        | 3        | 3.1      | 3.1      |
| Met        | 0        | 0.7      | 0.8      |
| Phe        | 1        | 1.0      | 1.0      |
| Pro        | 2        | 2.5      | 3.3      |
| Ser        | 6        | 6.6      | 6.5      |
| Thr        | 19       | 18.7     | 18.6     |
| Tyr        | 1        | 0.9      | 1.0      |
| Val        | 3        | 3.4      | 3.3      |

<sup>a</sup> Sample B was analyzed 6 years after sample A.

**Table S2.** Water  $^2\text{H}$  relaxation rate from *TmAFP* samples A and B.<sup>a</sup>

| $\nu_0$ (MHz) | Relaxation rate, $R_1$ ( $\text{s}^{-1}$ ) |                      |                                 |
|---------------|--------------------------------------------|----------------------|---------------------------------|
|               | Sample A                                   | Sample B uncorrected | Sample B corrected <sup>b</sup> |
| 4.58          | 2.84                                       | 2.76                 | 2.83                            |
| 6.86          | 2.80                                       | 2.71                 | 2.77                            |
| 11.96         | 2.68                                       | 2.62                 | 2.68                            |

<sup>a</sup> Sample B was measured 6 years after sample A.

<sup>b</sup> Corrected for lower solvent deuterium fraction by multiplication with viscosity ratio  $\eta(X_{\text{D}}=0.476) / \eta(X_{\text{D}}=0.369) = 1.022$  (at 27 °C).

**Table S3.** Water  $^{17}\text{O}$  relaxation rate at 81 MHz before and after emulsification.

| Sample    | Relaxation rate, $R_1$ ( $\text{s}^{-1}$ ) <sup>a</sup> |       |
|-----------|---------------------------------------------------------|-------|
|           | Before                                                  | After |
| Reference | 1499                                                    | 1502  |
| Sample B  | 1569                                                    | 1572  |

<sup>a</sup> Estimated experimental uncertainty  $\pm 5 \text{ s}^{-1}$ .

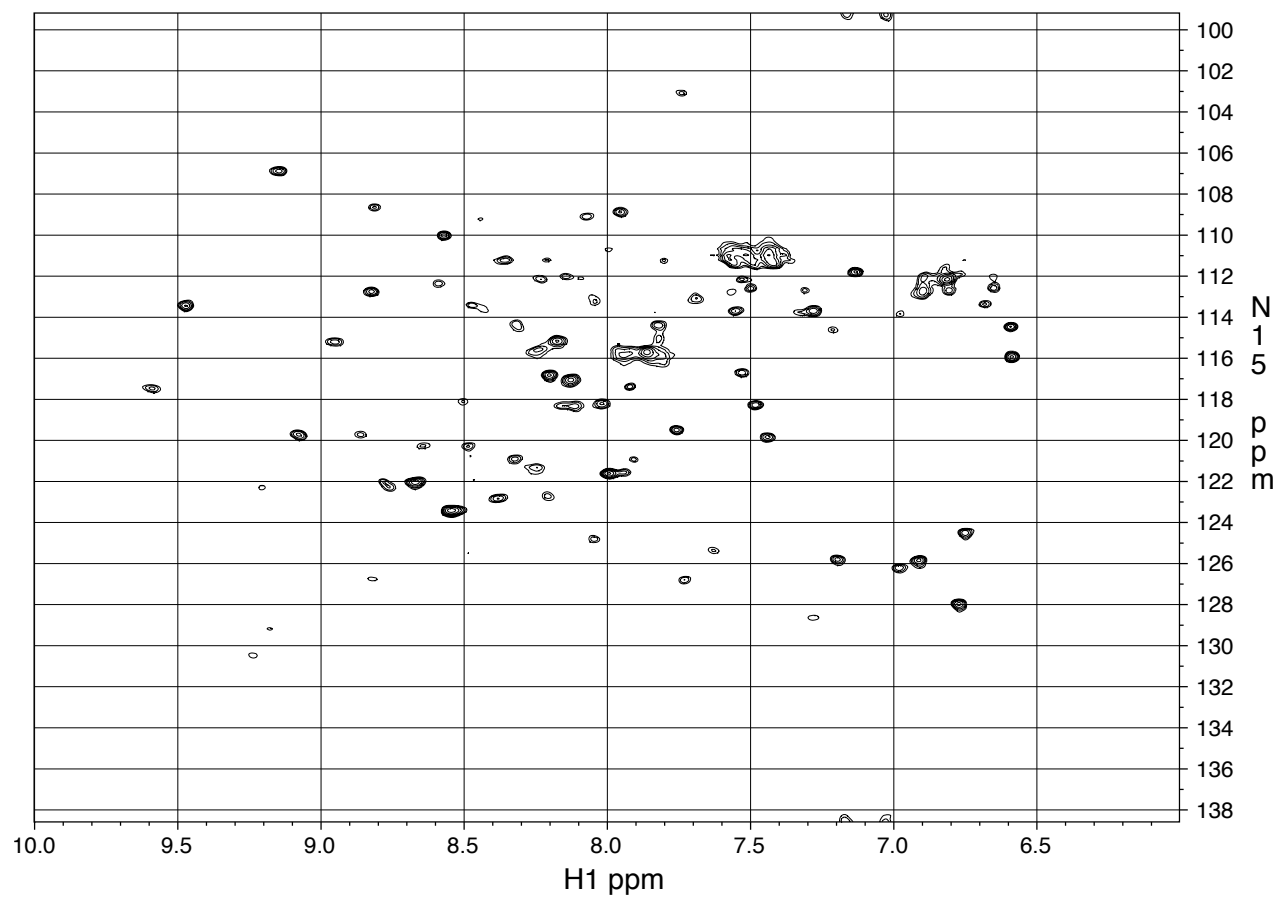

**Figure S1.**  $^1\text{H}$ - $^{15}\text{N}$  heteronuclear multiple-quantum coherence (HMQC) correlation spectrum of *TmAFP* sample B (at natural  $^{15}\text{N}$  abundance) recorded at 600 MHz after the MRD experiments.
